# Supplementary material for: Two metal–organic frameworks based on a double azolium derivative: post-modification and catalytic activity
Source: Royal Society of Chemistry journal article supplement (doi:10.1039/c1cc14393j), 2011-01-01
Supplement: c1cc14393j.pdf [file c1cc14393j.pdf]

Supporting Information for

**Two metal-organic frameworks based on a double azolium derivative:  
post-modification and catalytic activity**

Guo-Qiang Kong, Xuan Xu, Chao Zou, and Chuan-De Wu\*

*Department of Chemistry, Zhejiang University, Hangzhou 310027, P. R. China*

E-mail: [cdwu@zju.edu.cn](mailto:cdwu@zju.edu.cn)

**Experimental Section**

**Materials and Measurements.** All of the chemicals were obtained from commercial sources and were used without further purification. 1-(4-methylcarboxyphenyl)-imidazole was prepared according to the literature method.<sup>1</sup> Element analyses were performed on a ThermoFinnigan Flash EA 1112 elementary analyzer. IR spectra (KBr pellets) were taken on an AVATAR-370 Nicolet spectrometer in the 4000-400 cm<sup>-1</sup> region. Inductively coupled plasma mass spectrometries (ICP-MS) were performed on an XSeries II instrument. Transmission electron microscopy (TEM) experiments were conducted using a JEOL JEM-1230 microscope operated at 80 kV. X-ray photoelectron spectroscopy (XPS) measurements were recorded on a VG ESCALAB MARK II system, and the C<sub>1s</sub> line at 284.9 eV was used as the binding energy reference. Thermogravimetric analyses (TGA) were carried out on a SDT Q600 compositional analysis instrument from 30 to 800 °C under N<sub>2</sub> atmosphere at a heating rate of 10 °C/min. Powder X-ray diffraction data (PXRD) were recorded on a RIGAKU D/MAX 2550/PC for Cu-K $\alpha$  ( $\lambda$  = 1.5406 Å). Luminescent spectra for the solid samples were recorded with a Hitachi F4500 fluorescence spectrometer. <sup>1</sup>H NMR spectra were recorded on a 500 MHz spectrometer in CDCl<sub>3</sub> or D<sub>2</sub>O solution and the chemical shifts were reported relative to internal standard TMS (0 ppm).

**X-ray crystal data collections and structure determinations.**

The determinations of the unit cells and data collections for the crystals of **1** and **2** were performed on an Oxford Xcalibur Gemini Ultra diffractometer with an Atlas

detector. The data were collected using graphite-monochromatic Mo-K $\alpha$  radiation ( $\lambda$  = 0.71073 Å) at 293 K. The data sets were corrected by empirical absorption correction using spherical harmonics, implemented in SCALE3 ABSPACK scaling algorithm.<sup>2</sup> The structures were solved by direct methods, and refined by full-matrix least-square methods with the **SHELX-97** program package.<sup>3</sup> All non-hydrogen atoms including solvent molecules were located successfully from Fourier maps and were refined anisotropically. The H atoms on C atoms were generated geometrically.

**Synthesis of H<sub>2</sub>LCl<sub>2</sub>.** A mixture of 1-(4-methylcarboxyphenyl)-imidazole (2.02 g, 10 mmol) and CH<sub>2</sub>Br<sub>2</sub> (5 mL) in 40 mL toluene was refluxed for 4 days. After the reaction was cooled down to room temperature, the resulting precipitate was filtered, washed with toluene, and dried at 50 °C to give the ester of the ligand. The resultant was subsequently dissolved in 20% HCl aqueous solution (20 mL) and refluxed for 12 h. The solvent was removed under reduced pressure to give white powder, which was recrystallized as colorless crystals in H<sub>2</sub>O (Yield: 40%). <sup>1</sup>H NMR (500 MHz, D<sub>2</sub>O):  $\delta$  = 2.07 (s, 2H), 6.85 (s, 2H), 7.66 (d, J = 8.5 Hz, 4H), 7.94 (s, 2H), 8.02 (s, 2H), 8.10 (d, J = 8.5 Hz, 4H). <sup>13</sup>C NMR (125 MHz, D<sub>2</sub>O):  $\delta$  = 59.9, 122.8, 123.2, 123.4, 131.9, 132.6, 136.6, 137.8, 169.4. IR (KBr pellet, v/cm<sup>-1</sup>): 1700(s), 1608(m), 1554(s), 1433(w), 1396(m), 1352(w), 1334(w), 1246(s), 1220(s), 1173(m), 1113(w), 1076(w), 886(w), 854(m), 795(m), 771(m), 749(m), 692(m), 677(m), 626(w), 616(w), 522(w).

**Synthesis of 1.** H<sub>2</sub>LCl<sub>2</sub> (11 mg, 0.02 mmol) and Cu(NO<sub>3</sub>)<sub>2</sub>·3H<sub>2</sub>O (24 mg, 0.1 mmol) were thoroughly dissolved in 10 mL MeOH and 10 mL EtOH, which was subsequently heated 65 °C for 24 h. Blue crystals of **1** were isolated by filtration, washed with EtOH, and dried in air (Yield: 70%). Anal. Cald. for **1** (%): C, 42.83; H, 3.43; N, 13.62. Found: C, 43.12; H, 3.68; N, 13.17. IR (KBr pellet, v/cm<sup>-1</sup>): 1610(s), 1551(s), 1384(s), 1331(s), 1215(s), 1073(m), 1042(w), 1017(w), 957(w), 866(w), 847(w), 782(m), 736(w), 700(m), 614(w), 537(w).

**Synthesis of 2.** The pH value of  $\text{H}_2\text{LCl}_2$  (10 mg, 0.02 mmol) in 5 mL water was adjusted to 7 using 1.0 mol/L NaOH aqueous solution, and  $\text{CuCl}_2 \cdot 2\text{H}_2\text{O}$  (16 mg, 0.09 mmol) was subsequently added into the mixture. After the mixture was heated at 80 °C for 1 h under stirring, 10 mL EtOH was added in the filtrate. Green crystals of **2** were formed after three days at room temperature, which were isolated by filtration, washed with EtOH, and dried in air (Yield: 53%). Anal. Calcd for **2** (%): C, 46.64; H, 3.35; N, 10.36. Found: C, 46.89; H, 3.41; N, 9.88. IR (KBr pellet,  $\text{v}/\text{cm}^{-1}$ ): 1610(s), 1585(s), 1553(s), 1420(m), 1365(s), 1314(m), 1232(m), 1218(m), 1077(m), 1046(w), 1015(m), 955(w), 861(m), 848(m), 785(m), 770(m), 710(m), 617(m), 535(w).

**Synthesis of  $\text{CuL}_{0.24}\text{L}'_{0.76}\text{Pd}_{0.76}(\text{H}_2\text{O})_4(\text{NO}_3)_2$  (3).** To a THF solution (20 mL) of  $\text{Pd}(\text{OAc})_2$  (45 mg, 0.20 mmol), **1** (125 mg, 0.20 mmol) was added, which was stirred at room temperature for 4 h, then refluxed for 12 h in an insert  $\text{N}_2$  atmosphere. The resulting light brown powder was filtered, washed with THF, MeOH, and  $\text{Et}_2\text{O}$ , and dried in air. Anal. Calcd for **3** (%): C, 34.77; H, 2.85; N, 11.59; Pd, 11.15. Found: C, 34.30; H, 2.82; N, 10.97; Pd, 11.02. IR (KBr pellet,  $\text{v}/\text{cm}^{-1}$ ): 1629(s), 1550(s), 1385(s), 1333(s), 1216(s), 1074(m), 1037(m), 1021(w), 956(w), 862(w), 847(w), 783(m), 733(w), 701(m), 615(w), 542(w).

**Synthesis of  $\text{CuL}_{0.76}\text{L}'_{0.24}\text{Cl}_2\text{Pd}_{0.24}(\text{H}_2\text{O})_{1.5}$  (4).** The synthesis procedure of **4** is similar to that of **3**, except **1** was replaced by **2**. Anal. Calcd for **4**(%): C, 43.85; H, 3.29; N, 9.74; Pd, 4.44. Found: C, 43.09; H, 3.12; N, 9.27; Pd, 4.40. IR (KBr pellet,  $\text{v}/\text{cm}^{-1}$ ): 1610(s), 1585(s), 1553(s), 1420(m), 1365(s), 1314(w), 1232(s), 1218(s), 1174(w), 1137(w), 1078(m), 1047(w), 1015(m), 956(w), 861(m), 848(m), 785(m), 770(m), 710(m), 694(w), 653(w), 617(m), 583(w), 535(w).

**A typical procedure for the Suzuki-Miyaura coupling reaction catalyzed by solid 3.** Bromobenzene (0.22 mmol), phenylboronic acid (0.33 mmol),  $\text{K}_2\text{CO}_3$  (0.44 mmol) and **3** (10 mol% based on Pd) were stirred in 5 mL toluene at 70 °C for 12 h in an air atmosphere. After the reaction was complete, the reaction mixture was cooled

down to room temperature, which was filtered, extracted with ethyl acetate/water. The organic layer was separated, dried over anhydrous  $\text{MgSO}_4$  and concentrated in vacuum. The residue was subjected to chromatography on silica gel using hexane as eluent to give the isolated yield.

**$^1\text{H}$  NMR spectra data for the Suzuki-Miyaura coupling products.**

**Biphenyl:**  $^1\text{H}$  NMR (500 MHz,  $\text{CDCl}_3$ ):  $\delta$  7.33 (t,  $J = 7.4$  Hz, 2H), 7.42 (t,  $J = 7.5$  Hz, 4H), 7.59 (d,  $J = 7.3$  Hz, 4H).

**4-Methoxybiphenyl:**  $^1\text{H}$  NMR (500 MHz,  $\text{CDCl}_3$ ):  $\delta$  3.85 (s, 3H), 6.97 (d,  $J = 8.7$  Hz, 2H), 7.28 (t,  $J = 7.3$  Hz, 1H), 7.40 (t,  $J = 7.6$  Hz, 2H), 7.52-7.56 (m, 4H).

**3-Methylbiphenyl:**  $^1\text{H}$  NMR (500 MHz,  $\text{CDCl}_3$ ):  $\delta$  2.45 (s, 3H), 7.17 (t,  $J = 6.8$  Hz, 1H), 7.33-7.38 (m, 2H), 7.41-7.47 (m, 4H), 7.61 (d,  $J = 7.2$  Hz, 2H).

**4-Methylbiphenyl:**  $^1\text{H}$  NMR (500 MHz,  $\text{CDCl}_3$ ):  $\delta$  2.16 (s, 3H), 7.24 (d,  $J = 6.8$  Hz, 2H), 7.30-7.36 (m, 1H), 7.41-7.45 (m, 2H), 7.48 (d,  $J = 8.1$  Hz, 2H), 7.57-7.60 (m, 2H).

**Biphenyl-4-carboxaldehyde:**  $^1\text{H}$  NMR (500 MHz,  $\text{CDCl}_3$ ):  $\delta$  7.40 (t,  $J = 7.3$  Hz, 1H), 7.47 (t,  $J = 7.2$  Hz, 2H), 7.63 (d,  $J = 7.2$  Hz, 2H), 7.75 (d,  $J = 8.2$  Hz, 2H), 7.95 (d,  $J = 8.3$  Hz, 2H), 10.06 (s, 1H).

**2-Nitro-biphenyl:**  $^1\text{H}$  NMR (500 MHz,  $\text{CDCl}_3$ ):  $\delta$  7.31-7.33 (m, 2H), 7.40-7.49 (m, 5H), 7.60 (t,  $J = 7.5$  Hz, 1H), 7.84 (d,  $J = 7.9$  Hz, 1H).

**References**

1. a) S. Ahrens, E. Herdtweck, S. Goutal, T. Strassner, *Eur. J. Inorg. Chem.*, 2006, 1268; b) J. Liu, J. Chen, J. Zhao, Y. Zhao, L. Li, H. Zhang, *Synthesis*, 2003, 2661.
2. *CrysAlisPro*, version 1.171.33.56; Oxford Diffraction Ltd.: Oxfordshire, U.K., 2010.
3. G. M. Sheldrick, *Program for Structure Refinement*: University of Göttingen, Germany, 1997.

## Figures:

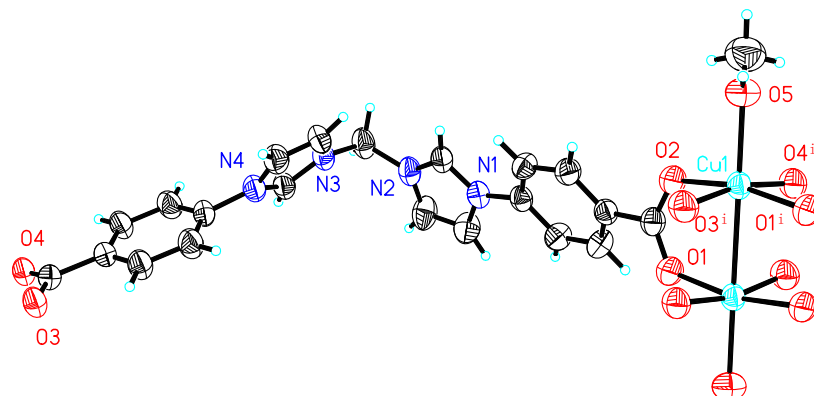

**Fig. S1.** ORTEP representation of the symmetry expanded local structure for **1**. Displacement ellipsoids are drawn at the 35% probability level.

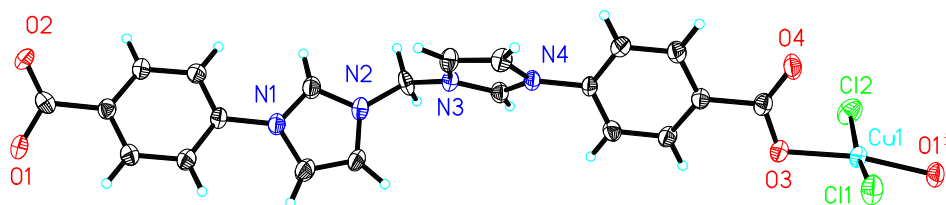

**Fig. S2.** ORTEP representation of the symmetry expanded local structure for **2**. Displacement ellipsoids are drawn at the 35% probability level.

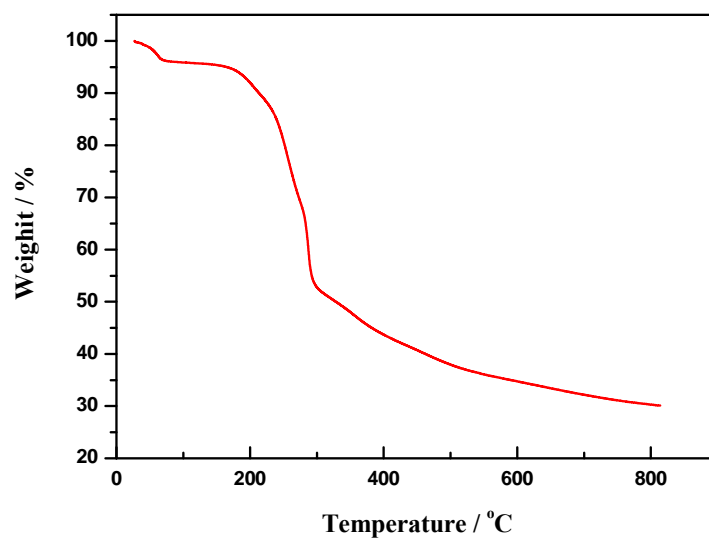

**Fig. S3.** TG result of **1**.

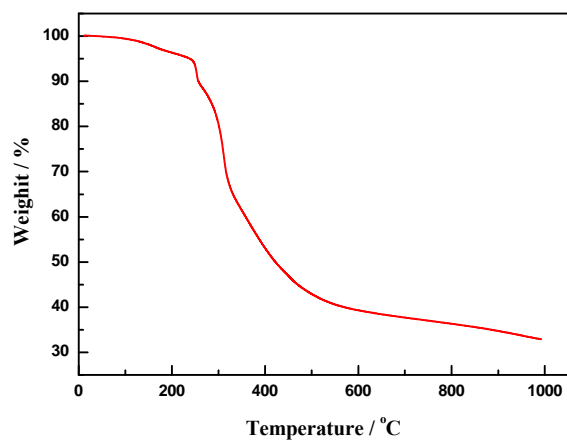

**Fig. S4.** TG result of **2**.

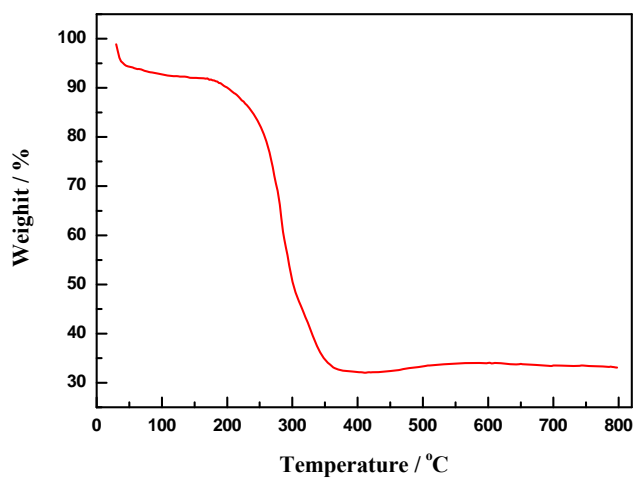

**Fig. S5.** TG result of **3**.

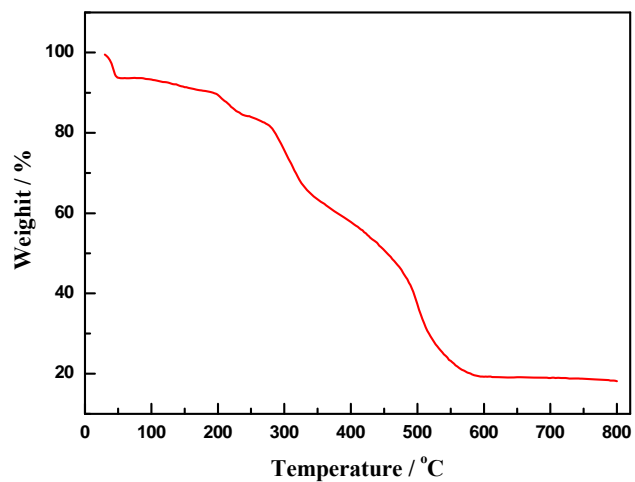

**Fig. S6.** TG result of **4**.

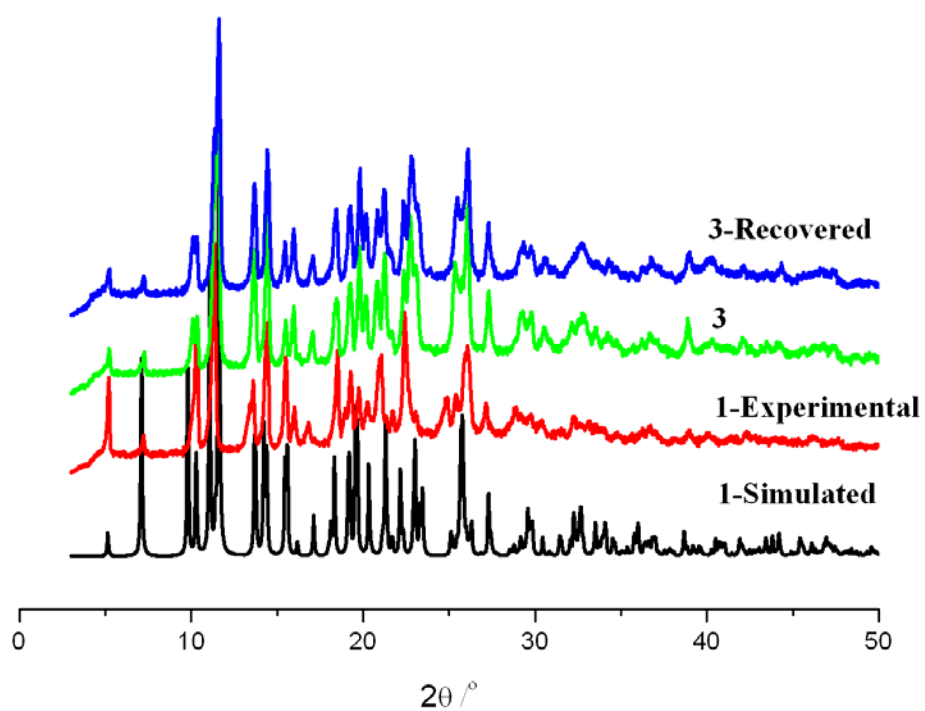

**Fig. S7.** Powder X-ray diffraction patterns for **1** and **3**.

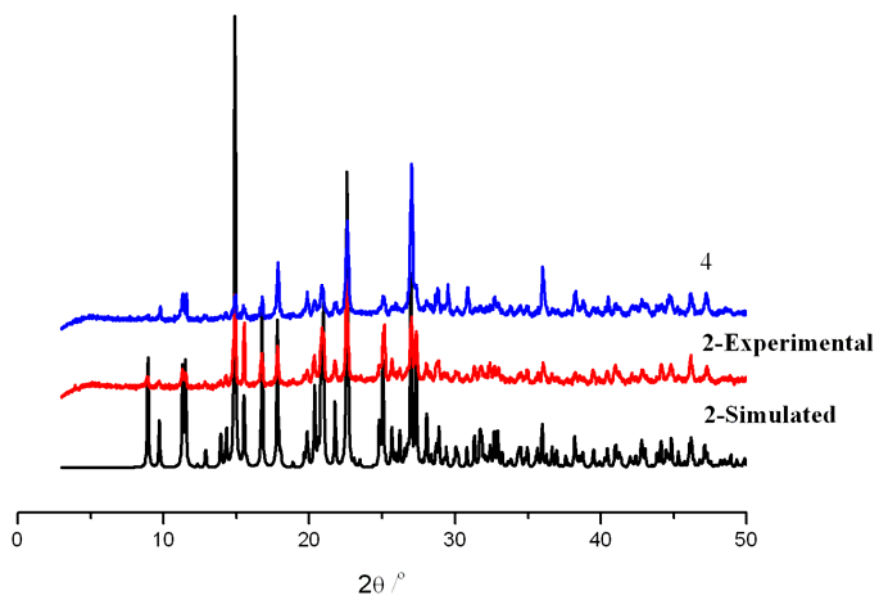

**Fig. S8.** Powder X-ray diffraction patterns for **2** and **4**.

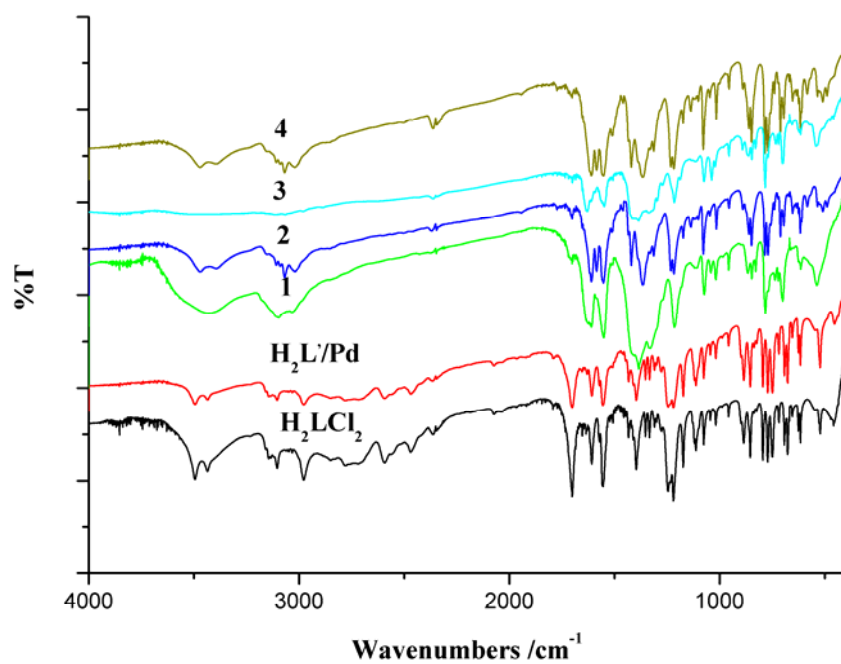

**Fig. S9.** FT-IR spectra for compounds **1**, **2**, **3**, **4**, H<sub>2</sub>LCl<sub>2</sub> and H<sub>2</sub>L'/Pd.

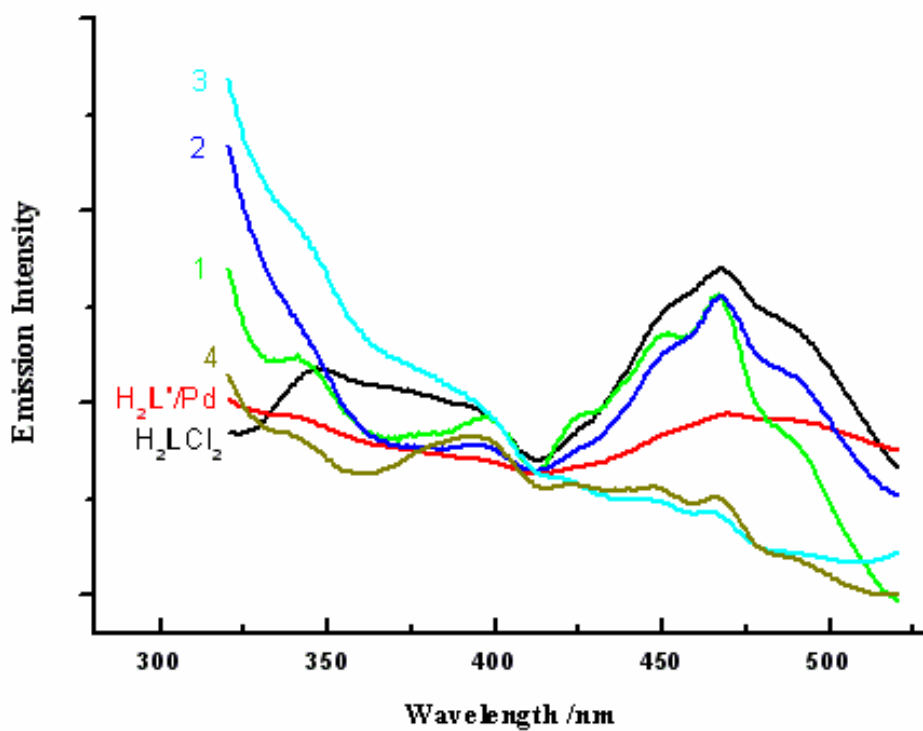

**Fig. S10.** Solid-state luminescent spectra for **1**, **2**, **3**, **4**, H<sub>2</sub>LCl<sub>2</sub> and H<sub>2</sub>L'/Pd ( $\lambda_{\text{ex}}$  = 280 nm).



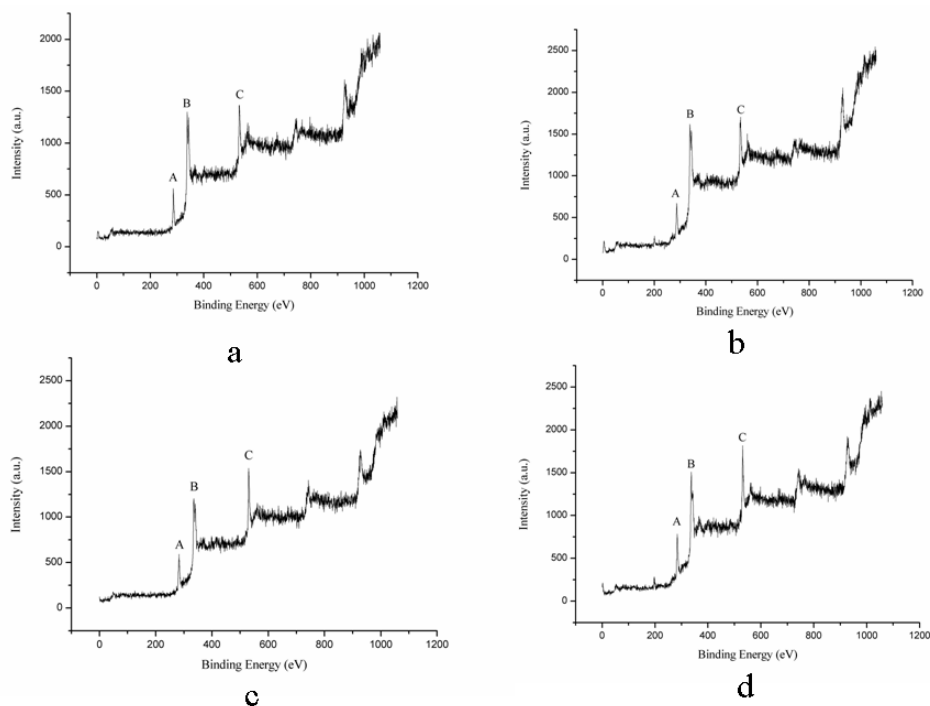

**Fig. S11.** X-Ray photoelectron spectra (XPS): a) for **3**; b) for **4**; c) for the recovered sample of **3** after three catalytic cycles and d) for the recovered sample of **4** after three catalytic cycles (A: C 1s; B: Pd 3d<sub>5/2</sub>, 3d<sub>3/2</sub>; C: O 1s).

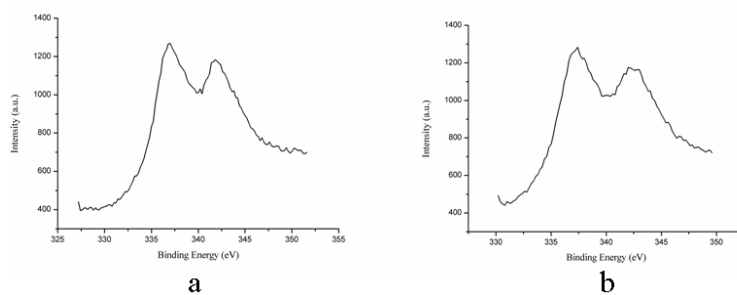

**Fig. S12.** XPS spectra (Pd 3d level) for **3**: a) freshly prepared sample of **3**; b) recovered sample of **3** after three catalytic cycles.

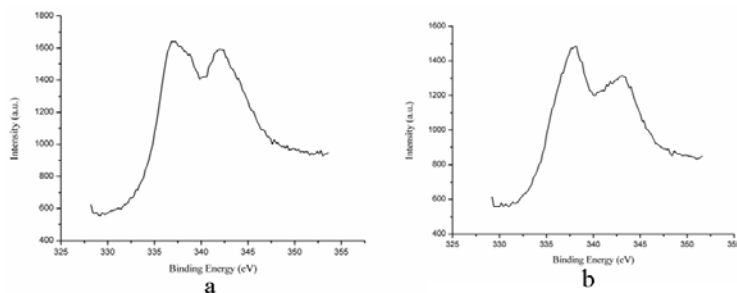

**Fig. S13.** XPS spectra (Pd 3d level) for **4**: a) freshly prepared sample of **4**; b) recovered sample of **4** after three catalytic cycles.

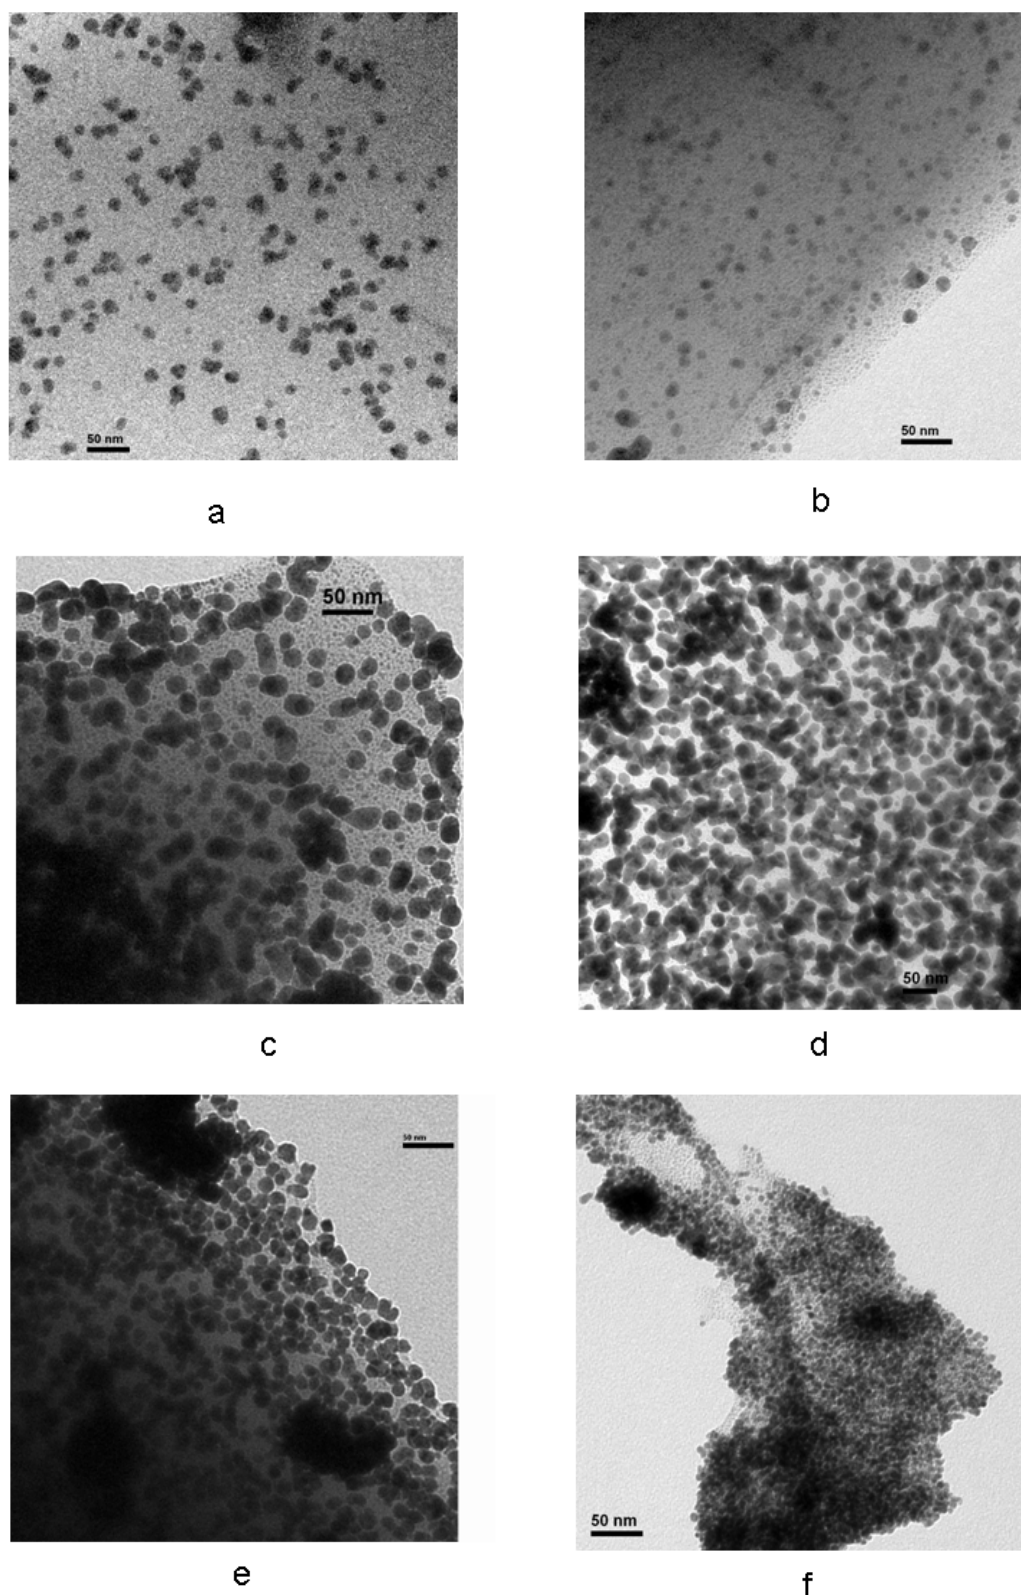

**Fig. S14.** TEM images for the samples of **1**, **2**, **3** and **4**: a) for **1**; b) for **2**; c) for **3**; d) for **4**; e) for the recovered sample of **3** after three catalytic cycles; f) for the recovered sample of **4** after three catalytic cycles.

Tables:

**Table S1.** Crystal data and structure refinements for compounds **1** and **2**.

| Compound                                                                    | <b>1</b>                                                                        | <b>2</b>                                                                        |
|-----------------------------------------------------------------------------|---------------------------------------------------------------------------------|---------------------------------------------------------------------------------|
| Chemical formula                                                            | C <sub>44</sub> H <sub>42</sub> Cu <sub>2</sub> N <sub>12</sub> O <sub>23</sub> | C <sub>21</sub> H <sub>18</sub> Cl <sub>2</sub> CuN <sub>4</sub> O <sub>5</sub> |
| Formula weight                                                              | 1233.98                                                                         | 540.83                                                                          |
| Crystal system                                                              | Monoclinic                                                                      | Monoclinic                                                                      |
| Space group                                                                 | <i>P</i> 2 <sub>1</sub> / <i>c</i>                                              | <i>P</i> 2 <sub>1</sub> / <i>n</i>                                              |
| <i>a</i> (Å)                                                                | 17.7000(19)                                                                     | 10.7438(7)                                                                      |
| <i>b</i> (Å)                                                                | 18.053(2)                                                                       | 14.3440(7)                                                                      |
| <i>c</i> (Å)                                                                | 8.6682(9)                                                                       | 13.8748(6)                                                                      |
| $\alpha$ (°)                                                                | 90                                                                              | 90                                                                              |
| $\beta$ (°)                                                                 | 103.843(11)                                                                     | 98.959(5)                                                                       |
| $\gamma$ (°)                                                                | 90                                                                              | 90                                                                              |
| <i>V</i> (Å <sup>3</sup> )                                                  | 2689.4(5)                                                                       | 2112.15(19)                                                                     |
| <i>Z</i>                                                                    | 2                                                                               | 4                                                                               |
| $\rho_{\text{calcd}}$ (g.cm <sup>-3</sup> )                                 | 1.524                                                                           | 1.701                                                                           |
| $\mu$ (mm <sup>-1</sup> )                                                   | 0.883                                                                           | 1.331                                                                           |
| <i>F</i> (000)                                                              | 1264                                                                            | 1100                                                                            |
| Data / parameters                                                           | 5151/370                                                                        | 4309/298                                                                        |
| <i>R</i> <sub>int</sub>                                                     | 0.0409                                                                          | 0.0497                                                                          |
| GOF on <i>F</i> <sup>2</sup>                                                | 1.167                                                                           | 0.902                                                                           |
| <i>R</i> <sub>1</sub> , <i>wR</i> <sub>2</sub> [ <i>I</i> > 2σ( <i>I</i> )] | 0.0819, 0.1971                                                                  | 0.0438, 0.0495                                                                  |
| <i>R</i> <sub>1</sub> , <i>wR</i> <sub>2</sub> [all data]                   | 0.1236, 0.2243                                                                  | 0.1084, 0.0532                                                                  |

$$R_1 = \sum(|F_o| - |F_c|) / \sum|F_o|, wR_2 = [\sum[w(F_o^2 - F_c^2)^2] / \sum w(F_o^2)^2]^{0.5}.$$

**Table S2.** Selected bond parameters of **1** (Å, °)

|                                        |            |                                       |           |
|----------------------------------------|------------|---------------------------------------|-----------|
| Cu1-O1 <sup>i</sup>                    | 1.953(4)   | Cu1-O3 <sup>ii</sup>                  | 1.952(4)  |
| Cu1-O2                                 | 1.965(4)   | Cu1-O4 <sup>iii</sup>                 | 1.974(4)  |
| Cu1-Cu1 <sup>i</sup>                   | 2.6506(15) | Cu1-O5                                | 2.146(5)  |
| O1 <sup>i</sup> -Cu1-O4 <sup>iii</sup> | 88.46(19)  | O4 <sup>iii</sup> -Cu1-O5             | 94.9(2)   |
| O2-Cu1-O3 <sup>ii</sup>                | 89.6(2)    | O5-Cu1-O2                             | 94.5(2)   |
| O3 <sup>ii</sup> -Cu1-Cu1 <sup>i</sup> | 83.78(15)  | Cu1 <sup>i</sup> -Cu1-O1 <sup>i</sup> | 83.42(15) |

Symmetry codes: (i)  $-x+1, -y+2, -z+1$ ; (ii)  $-x, y-1/2, -z+1/2$ ; (iii)  $x+1, -y+5/2, z+1/2$ .

**Table S3.** Selected bond parameters of **2** (Å, °)

|                          |          |                         |          |
|--------------------------|----------|-------------------------|----------|
| Cu1-O1 <sup>i</sup>      | 1.960(2) | Cu1-O3                  | 1.931(2) |
| Cu1-Cl1                  | 2.284(1) | Cu1-Cl2                 | 2.239(1) |
| O1 <sup>i</sup> -Cu1-Cl1 | 88.80(8) | Cl1-Cu1-O3              | 92.06(9) |
| O3-Cu1-Cl2               | 89.45(8) | Cl2-Cu1-O1 <sup>i</sup> | 91.69(8) |

Symmetry codes: (i)  $x+1/2, -y+1/2, z-3/2$ ; (ii)  $x-1/2, -y+1/2, z+3/2$ .
